# Supplementary material
Source: PubMed Central journal article supplement (PMC6129208)
Supplement: NIHMS975231-supplement.pdf [file NIHMS975231-supplement.pdf]

**Supplemental Figure. Participant flow chart.**

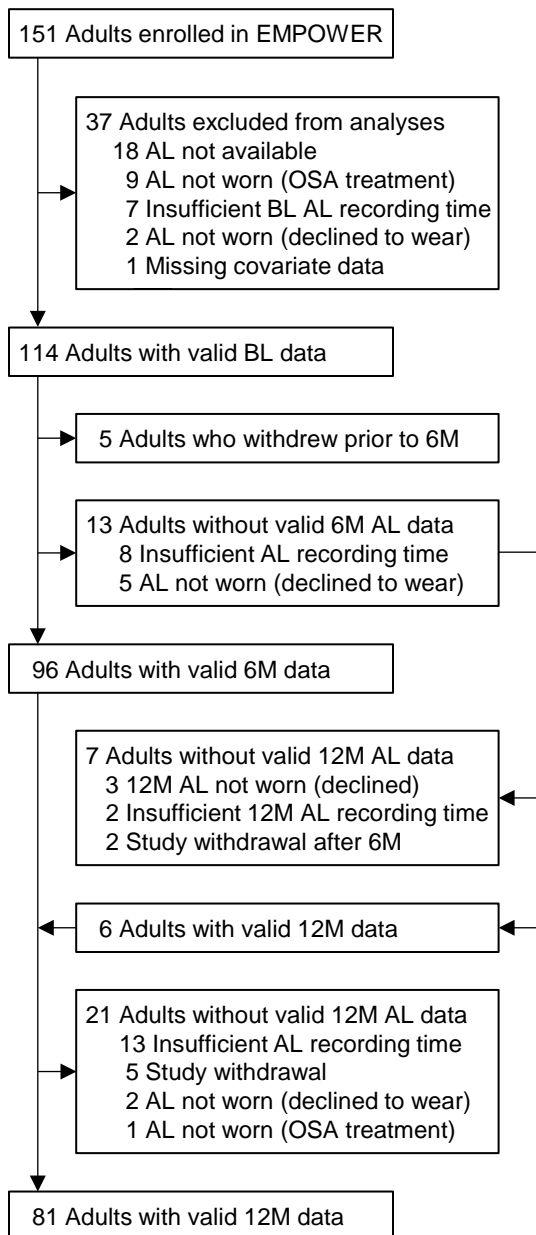

Abbreviations: 6M=6-month; 12M=12-month; AL=ApneaLink; BL=baseline; OSA=obstructive sleep apnea.
